# Supplementary material for: Towards physically consistent data-driven weather forecasting: Integrating data assimilation with equivariance-preserving spatial transformers in a case study with ERA5
Source: Copernicus journal article supplement (doi:10.5194/gmd-2021-71), 2021-04-12
Supplement: Supplementary file [file gmd-2021-71-AC2-supplement.pdf]

## Referee 2

*The present manuscript introduces a new deep learning framework to forecast global geopotential height. More specifically, the authors introduce a U-NET (Sec 3.1, Fig 1) using circular convolutions (Sec 3.1.1) and augment it with an equivariance-preserving module (U-STN, Sec 3.1.2) to improve the overall accuracy of the forecast (Fig 3) and the consistency of the predicted patterns (Fig 4). They couple the resulting network with a sigma-point Ensemble Kalman filter (SPEnKF, Sec 3.2) that allows to assimilate "noisy observations" every 24 hours (Fig 5) or "virtual observations" every 12 hours produced by the same network run with a longer timestep (Fig 7). Evaluated using hourly, coarse-grained (Sec 2), ERA5 [2] meteorological reanalysis of 500-hPa geopotential height (Z500) from WeatherBench [3], the equivariance preserving network using the SPEnKF to assimilate both "virtual" and "noisy observations" improves the performance of the same framework only assimilating "noisy observations" (Fig 8+9).*

*The manuscript is generally well-written, well-referenced, logically structured; its figures are clear and its (surprisingly simple) code is accessible on GitHub (<https://github.com/ashesh6810/DDWP-DA>) and properly shared via Zenodo (DOI10.5281/zenodo.4646676). Given the methodological novelty and applicability of the U-STN+SPEnKF framework to data-driven weather forecasting, I recommend eventually publishing the present manuscript in Geoscientific Model Development (GMD). That being said, the article's impact may be hindered by incomplete benchmarking 1.1, a lack of testing on other meteorological variables 1.2, little justification of the equivariance-preserving module 1.3, and overly technical writing that may not be appropriate for GMD's audience 1.4. More details 1 and minor comments 2 are given below. I am optimistic that once improved, the manuscript will be a welcome addition to GMD and a helpful contribution to the sub-field of data-driven weather forecasting.*

We thank the referee for their positive and constructive comments on the contribution of this manuscript to the field of data-driven weather forecasting. Their comments have helped us immensely in improving the clarity of the manuscript. All changes in the revised manuscript have been highlighted in blue. Herein, we present point-by-point responses to the referee's comments.

### **Referee's comment:**

1 Major Issues

#### *1.1 Benchmarking*

*[L220-244, Fig3] The manuscript's premise is that adding the equivariance-preserving module may improve the accuracy of data-driven weather forecasting, which is demonstrated by training a U-NET with and without the equivariance-preserving module and showing the resulting improvement in accuracy (as measured by the anomaly correlation coefficient) for lead times between 12 and 240 hours. This raises several issues:*

- Despite using a well-defined benchmark (WeatherBench, [3]), the root mean squared error (RMSE) is never calculated for the predictions without data assimilation (U-NET/U-STN), which prevents objective comparison with the baselines listed in Figure 2/Table 2 of [3]. I recommend at least calculating the RMSE in Z500 for lead times of 3 and 5 days to put the manuscript's results into the context of existing results (e.g., do U-NET/U-STN beat the simple linear regression leading to  $RMSE_{Z500}(3days) \approx 693 \text{ m}^2 \text{ s}^{-2}$  without data*

*assimilation? If the authors consider that only Z500 should be used as a predictor, then how do U-NET/U-STN perform compared to the linear regression equivalent that only uses Z500 as a predictor?).*

**Author’s response:** We thank the referee for raising the question of comparing our data-driven model with the existing models in the WeatherBench [1] benchmark. We have, in our manuscript, reported the RMSE values of both U-STNx and U-NETx models (where x is 1, 6, and 12) in Figure 6 (left panel). We show that the best U-STNx model, i.e., U-STN12 have RMSE of  $30m$  or  $294 m^2s^{-2}$  ( $30m \times 9.8ms^{-2}$  where  $g = 9.8 ms^{-2}$  is the acceleration due to gravity) in Z500 at 3 days of lead time and  $50m$  or  $490 m^2s^{-2}$  at 5 days of lead time without data assimilation (DA). Herein, Table 1, we present the comparison of U-STN12 with the models in WeatherBench [1] for lead time of 3 and 5 days from Figure 2 (of the WeatherBench [1] paper) as indicated by the referee.

**Table 1.** A comparison between U-STN12 presented in this manuscript and the linear regression and CNN models from WeatherBench [1]. Here, we have used the RMSE values of direct linear regression and CNN prediction at day 3 and day 5. Here “direct” refers to the models trained to predict Z500 directly at 3 and 5 days instead of iteratively predicting every hour.

| Models                                       | RMSE ( $m^2s^{-2}$ ) at 3 days | RMSE ( $m^2s^{-2}$ ) at 5 days |
|----------------------------------------------|--------------------------------|--------------------------------|
| Linear regression (direct) from WeatherBench | 693                            | 783                            |
| CNN (direct) from WeatherBench               | 626                            | 757                            |
| U-STN12 (our model)                          | <b>294</b>                     | <b>490</b>                     |

As shown in Table 1, U-STN12 outperforms both linear regression and CNN models presented in WeatherBench. We have revised the manuscript to reflect this fact in Lines 275-280 in section 4.1. A short comparison between U-STN12 and the models in WeatherBench [1] has been provided in those above mentioned line numbers. However, we emphasize here, that the objective of our paper is not to present the best data-driven weather prediction (DDWP) model. Instead, we intend to show that a spatial-transformer module inside any DDWP architecture may improve the performance of the model and is shown by considering U-NET as an example architecture. While exploring all DDWP architectures is beyond the scope of this manuscript, other studies such as Wang et al., 2020 [2] has also shown the usefulness of equivariance-preserving architecture in spatio-temporal prediction of turbulent flow. Furthermore, we show in this paper, that a DDWP model can be integrated with DA without loss in stability of the DA algorithm or any indication of filter divergence which we have further explained in section 4.2. With such an integration of DDWP and DA, we also propose a proof-of-concept for a novel multi-step framework for improving the performance of the DDWP+DA model in section 4.3.

**Referee’s comment:**

- *Once put into the WeatherBench context, it remains unclear whether U-STN systematically improves upon U-NET or if the result depends on the single set of (hyperparameters, weights, biases) explored in this manuscript. For instance, the only sensitivity explored in*

*Figure 3 is that to initial conditions while the only sensitivity explored in Figure 6 is that to the timestep  $\Delta t$  I recommend more thoroughly testing the addition of the equivariance-preserving module across:*

*- Different weights and biases for a fixed set of hyperparameters by retraining U-NET/U-STN with different weights initializations and callbacks*

*- Different hyperparameters by changing the convolutional and dense layers characteristics (number, width, kernel size) within the U-NET/U-STN architectures*

*- Different architectures altogether: Would an equivariance-preserving module help an artificial neural network (with or without bottlenecks), simple linear models, etc.?*

*In summary, I recommend conducting sensitivity tests to determine whether the paper's key conclusions hold across architectures, hyperparameters, and different weights/biases.*

### **Authors' response:**

We thank the referee for pointing out this very practical need for thorough hyperparameter optimization (HPO) when presenting the performance of a model. In this manuscript, we have performed HPO thoroughly through extensive trial and error. We have independently optimized the hyperparameters of U-NETx and U-STNx. Specifically, we have considered the effect of changing the:

- Weight initialization (e.g., Gaussian random, log-normal, and Xavier) and seen that the generalization error (RMSE during validation) of the architecture is not sensitive to the initialization.
- The size of the convolution kernel ( $5 \times 5$ ), number of dense layers in the STN module (4), and the number of neurons in each of the 4 dense layers (500, 200, 100, 50) have been chosen after significant trial and error over these reported numbers.
- The equivariance-preserving module has been shown to be useful in convolutional architectures (regular encoder-decoder in Jaderberg et al., 2015 [3], U-NET in Wang et al., 2020 [2], and convolutional Res-Net in Wang et al., 2020 [2]). In most complex spatio-temporal modeling, 2D fields of states or observables are used to train the deep learning models. Such models are inherently convolutional in nature to account for the 2D fields on which they are trained. Fully-connected neural networks lose information about spatial correlation of the 2D fields and would perform poorly in predicting 2D fields. Hence, the advantage of equivariance inside such architectures may not be apparent. However, the theory of equivariance, as clearly explained in Wang et al, 2020 [2] and more recently in geometric deep learning by Bronstein et al., 2021 [3] is applicable to any architecture. More thorough analysis on the choice of architecture can be performed through very computationally expensive neural architectures search (NAS) as shown in Liu et al., 2018 [4]. An application of NAS in geophysical fluid dynamics has been shown in Maulik et al., 2020 [5] on the Argonne Leadership Computing Facility. However, owing to limited computational resources, NAS could not be performed in this study.

We have revised the manuscript in section 3 to clarify the extensive trail-and-error that has been performed on the hyperparameters of the architecture (Lines 175-178 and Caption of Table 2) and

have also cited the work on NAS for geophysical turbulence in Lines 160-162. We further emphasize here, that our objective is not to present the most performant deep learning architecture as the DDWP model, but to provide a proof-of-concept of the advantage of equivariance and then show the possibility of integration of DDWP with DA which builds into our novel multi-step framework for DDWP+DA.

***Referee's comment:***

*1.2 Testing the Framework on Other Meteorological Variables*

- *Given that the manuscript's conclusions should apply to data-driven weather forecasting in general, I recommend testing the framework on a few more meteorological variables, especially given how easy it is to download variables from WeatherBench and how short the manuscript's repository code is. Natural choices would be variables benchmarked in WeatherBench, i.e. 850-hPa temperature (T850), 2m temperature (T2M) and total precipitation (TP).*
- *At the very least, the authors should discuss how appropriate equivariance-preserving spatial transformers are for thermodynamic variables like T850, which (in contrast to dynamic variables like Z500) directly respond to the strong planetary gradient in solar insolation. I recommend adding at least T850 to clarify the generality of the results e.g. presented in Figure 3.*

**Authors' response:**

We thank the referee for pointing out this question about the generalizability of the architecture to predict on other meteorological variables. We agree with the referee that it is relatively easy to test the architecture on other variables. Following the referee's suggestion, we have conducted experiments to determine how well we can predict T850 with U-STN12 as compared to U-NET12. In Figure 1, shown here, we report the ACC of T850 with U-STN12 and U-NET12 (with U-STN12 outperforming U-NET12) which shows an improved prediction horizon as compared to Z500. This is likely due to the slow-moving nature of T850. We would like to clarify that in this experiment, we have used both Z500 and T850 as input to U-STN12 in 2 separate channels. We have revised the manuscript to add this information in the text in section 4.1 in Lines 271-274. However, in this manuscript, we intend to show a proof-of-concept wherein DA has been integrated with a DDWP model. In order to show that, we have taken Z500, simply as an example.

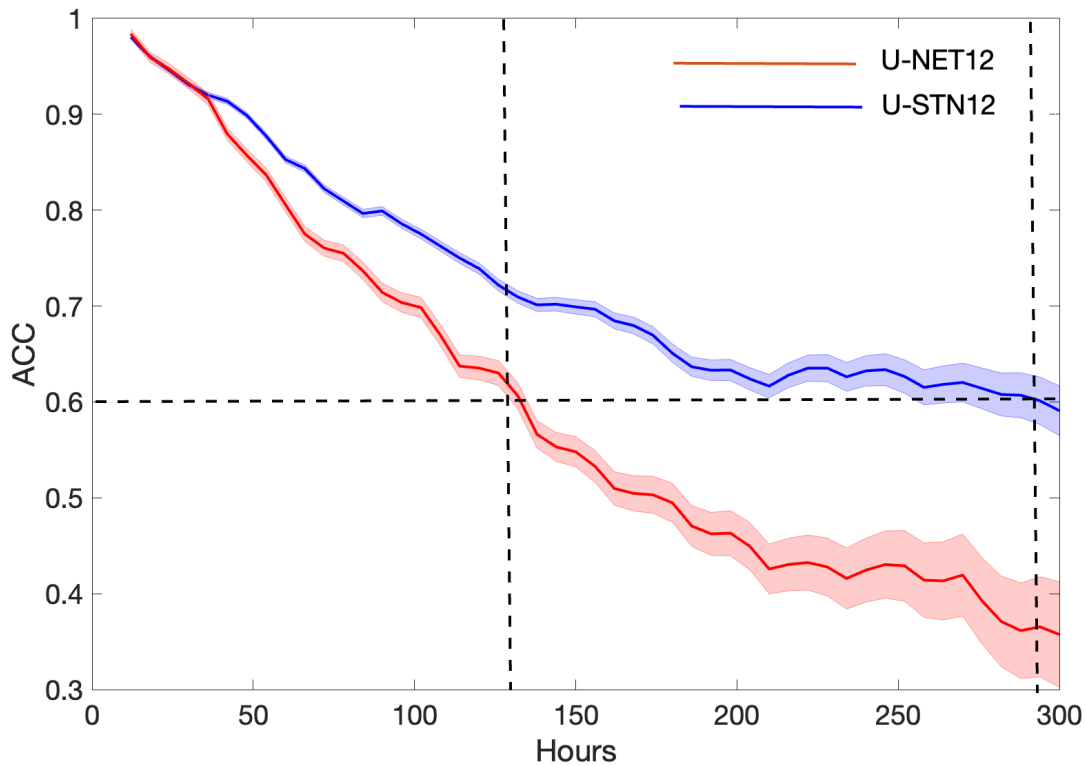

Figure 1. Anomaly correlation coefficient (ACC) calculated between T850 anomalies of ERA5 and T850 anomalies predicted using USTN12 and U-NET12 from 30 noise-free, random initial conditions. The solid lines and the shadings show the mean and the standard deviation over the 30 initial conditions.

As shown in Figure 1, U-STN12 performs well in terms of predicting T850 and outperforms U-NET12 as well. In general, as shown in multiple papers (cited inside the manuscript) including the WeatherBench paper, deep learning architectures can be used to predict on several meteorological variables and our finding is consistent with those studies.

*Referee's comment:*

*1.3 Justifying and Explaining Equivariance*

- In the other reference cited by the authors to justify using the spatial transformer module [4], the invariance under spatiotemporal translation, uniform motion, rotation/reflection, and scaling is justified for the Navier-Stokes and heat equation. However, when it comes to atmospheric dynamics, strong asymmetries exist in the horizontal (including but not limited to the Coriolis parameter for dynamical quantities, the solar insolation for thermodynamical quantity, and the land mass for all quantities). Therefore, I recommend*

*carefully justifying why it would be appropriate to use an equivariance-preserving module in the text of subsection 3.1.2.*

**Authors' response:**

We thank the referee for raising this important question of whether rotation, reflection, or translational symmetries exist in atmospheric dynamics. We agree with the referee that it indeed does not have to be the case. In fact, equivariance is a property that accounts for the lack of symmetry in rotation and tracks the rotational features in the spatio-temporal flows. Conventional CNNs tend to enforce rotational symmetry while equivariance-preserving module ensures that the symmetry is not preserved. The affine transformation inside the module tries to learn the rotation and scaling of features as the input is passed through the U-STN. We have further added a more comprehensive and recent review in geometric deep learning by Brochstein et al., 2021 [3] that explains the theory of equivariance and its application in deep learning in the revised manuscript. In the revised manuscript, between Lines 63-65, we clearly explain how equivariance ensures that an *a priori* rotational symmetry is *not* imposed within the architecture (at least in the latent space, in our architecture). We have further highlighted this and justified the use of an equivariance-preserving module in section 3.1.2 between Lines 150-152 in the revised manuscript.

*Referee's comment:*

- *Similarly, it would be helpful to more clearly justify/explain why equivariance-preserving networks would improve the representation of wave-breaking events, which are not rotationally nor translationally invariant. I recommend more rigorously justifying that claim by e.g., zooming in Figure 4, adding more variables and network configurations, and not relying on "As discussed before" when the word "breaking" was simply listed in L120.*

**Authors' response:**

We thank the referee for their comment. As explained in the previous response, equivariance ensures that we do not *a priori* impose rotational symmetry in the deep learning architecture. It accounts for relative change in positions of features that comes from rotation, translation, and scaling. However, it is still unclear (and hard to prove) that wavebreaking events can be captured simply with an equivariance-preserving module since wavebreaking is a very nonlinear process. We simply speculate that an equivariance-preserving network *may* improve the overall performance of prediction so that it captures *some* wave-breaking events. We have revised the manuscript (between Lines 255-259) to reflect this speculation and do not suggest that the equivariance-preserving module is either necessary or sufficient to capture wavebreaking, and this may very well be just an example. We have removed all lines that may suggest that equivariance-preserving modules may lead to better representation of wavebreaking.

***Referee's comment:***

*1.4 Making the Manuscript more Accessible to GMD's Audience*

*1.4.1 Presentation of the Sigma-Point Ensemble Kalman Filter*

*The authors adapt the Sigma-Point Ensemble Kalman Filter (SPEnKF, [1]) to augment their data-driven weather prediction framework with data assimilation (DDWP+DA). I found this description hard to follow because it lacks context and justification; I recommend revising the text to address the following questions:*

- Do the authors strictly follow the derivations/methods of [1] or are there some key modifications to couple it to the ML prediction framework?*
- Are analysis and "observations" used interchangeably here? In the affirmative, I would recommend sticking to one or the other.*
- According to [1], SPEnKF is particularly well-suited for non-Gaussian background/observation errors (e.g. multiplicative noise). Why then assume that  $\epsilon$  be Gaussian, which (if I understand the derivation correctly) leads to Gaussian observational errors as  $H = I$ ?*

*Additionally:*

*[L194] I recommend explicitly stating that representing observational noise using a random Gaussian process is a big approximation. [L197] "with a certain level of uncertainty": I recommend explicitly stating that the uncertainty will be ideally represented by varying  $\sigma_{\text{obs}}$ .*

*[L205] If  $P_{ab}$  is the cross-covariance matrix between the ensemble and observations, shouldn't the two last  $Z_{\text{ens}}$  be  $Z_{\text{obs}}$  in equation (8)?*

## Authors' response:

We thank the referee for their helpful suggestion to improve the clarity of our presentation of SPEnKF in the manuscript.

- We have followed the method outlined in Ambadan et al., 2011 [6].
- No, analysis and observations are not used interchangeably. Analysis is obtained from Eq. (9) in section 3.2. Observations are generated from the ERA5 data by adding Gaussian noise with 0 mean and  $\sigma_{obs}$  standard deviation. We have clarified this in the revised manuscript in Lines 233-234 in section 3.2.
- In this paper, we have considered a simple case where Gaussian observation noise is added to the true ERA5 data as is common in most DA literature [7,8,9]. This allows for a simple linear  $\mathbf{H}$  operator in the form of the identity matrix  $\mathbf{I}$ . Indeed, SPEnKF can account for non-Gaussian observation noise. Several other types of DA techniques such as particle filters [10] can also be used for non-Gaussian observation noise. However, such techniques are computationally intractable with high-dimensional systems. A DDWP model for particle generation in particle filters can also enable application of particle filters in high-dimensional systems.

We have revised our manuscript (Line 233) to explain that Gaussian noise in observations is an approximation but is used widely in literature and that the uncertainty in the observed state is given by  $\sigma_{obs}$  in Lines 218-219.

- We had a typo in the equations. We have now fixed that in the revised manuscript.

## Referee's comment:

### 1.4.2 Overly technical vocabulary used throughout the manuscript

*GMD is targeted at the geosciences community: Although the community is relatively quite proficient in computational science, a lot of the vocabulary and technical terms used throughout the manuscript makes it difficult to read without ML background. To make the manuscript more accessible to the geoscientific community, I recommend:*

- *Quickly defining technical ML/DA terms used throughout the manuscript the first time they are introduced. This includes but is not limited to: convolutional neural network, deep spatial transformer, equivariance, Ensemble Kalman filter, encoding/decoding, autoregressive models, etc.*
- *Alternatively, adding a "ML definition" Table to the manuscript.*



- *Using more intuitive acronyms. For instance, U-STN, SPEnKF, and DDWP+DA are not particularly intuitive and may force the readers to go back and forth when reading the manuscript.*

*Also see comments in 2 to improve the manuscript's accessibility.*

### **Authors' response:**

We thank the referee immensely for their helpful suggestions to improve the clarity and accessibility of the manuscript to the geosciences audience. Considering the suggestions, we have added a table in the revised manuscript, Table 1, where we have defined (with short descriptions) all ML/DA related, and framework related acronyms suggested by the referee. We hope that the inclusion of this table would improve the clarity of this manuscript further to the geosciences audience.

### *Referee comment*

#### *1.5 Reproducibility*

##### *1.5.1 Unet's architecture*

*[L113-L122] After checking the U-NET's architecture at [www.github.com/ashesh6810/DDWP-DA/blob/master/Unet\\_STN.ipynb](https://www.github.com/ashesh6810/DDWP-DA/blob/master/Unet_STN.ipynb) (same script as the one shared via Zenodo if I am not mistaken), I noticed that Figure 1 was not representative of the architectures used for U-NET/U-STN, which include additional dense layers after the convolutional layers. Additionally, because the authors do not disclose the type of pooling layers used in Figure 1, the architecture of the main algorithms used in the manuscript cannot be reproduced from the text.*

- *As the authors cite [5], I recommend following their Table 1 to transparently share the U-NET's architecture.*
- *Additionally, it would be nice to explicitly list the differences between [5] and this manuscript's U-NET, including (but not limited to) the presence of dense layers) to facilitate the comparison between the two frameworks.*

### **Authors' response:**

We thank the referee for their helpful suggestion on improving the reproducibility of the architecture used in this paper. We have slightly revised Figure 1 to include the dense layers which are a part of the localization network. The figure is used only as a schematic. We have further added Table 2 in the revised manuscript to include the detailed information on the exact architecture of U-STNx and U-NETx.

- We have further revised the manuscript between Lines 179-184 to highlight the difference between the architecture used in Weyn et al., [11] and ours. Here, we would like to emphasize that we do not claim that our architecture is more performant as compared to that used in Weyn et al., [11], but is simply the one we have chosen based on extensive trial-and-error in terms of HPO. Moreover, the architecture presented in Weyn et al., [11] uses data on a cubed sphere rather than a rectangular grid so is distinctly different from the framework shown in this paper.

***Referee's comment:***

*1.5.2 Weights and Biases*

*The weights and biases of the neural networks are not shared (to my knowledge) in the code's repository, making the manuscript non reproducible. I highly encourage the authors to share the weights and biases of their networks for reproducibility purposes.*

**Authors' response:**

Thank you for this excellent suggestion. We have now shared the weights and biases HDF5 file for reproducibility purposes.

***Referee's comment:***

*1.5.3 Equivariance-preserving Module*

The authors do not provide enough details to help readers implement the spatial transformer module. I recommend explicitly stating how to implement this module (the Bilinear Interpolation Class at <https://github.com/ashesh6810/DDWP-DA/blob/master/layers.py>). This could be done by e.g.:

- adding an "algorithm" in the manuscript's text, and
- giving more context for why the spatial transformer module requires adding a bi-linear interpolation kernel between the convolutions and the up-sampling.

**Authors' response:**

We thank the referee for their helpful suggestion. We have cited the original paper that had introduced STNs, Jaderberg et al., [12] in Line 142 in section 3.1.2 where details about the need for a differentiable interpolation kernel (bilinear interpolation in this case) has been clearly explained. The justification for using the interpolation kernel is rather elaborate and we feel that such methodological details in the manuscript may distract the readers from a geoscience community from the main points of the paper, which is to introduce STN as an equivariance-preserving module and integrate DDWP models with DA algorithms for weather forecasting. We have also provided the code for implementing the bilinear interpolation layer for reproducibility.

## *Referee's comment*

### *2 Minor Comments*

*[L37-39] Although it has been demonstrated for low-dimensional systems in fluid dynamics, it is not trivial that:*

- Incorporating physical constraints into a physics-agnostic data-driven weather prediction framework would require less data and hence remedy the short training set problem,*
- the equivariance-preserving spatial transformer introduced in this manuscript can be used to enforce physical constraints.*

### **Authors' response:**

We thank the referee for their insightful suggestions.

- We agree with the referee that previous literature in climate dynamics have not shown that physical constraints may help training neural networks with less training samples. However, a few recent papers have shown that physics-informed neural networks can be used to train on the shallow-water equations [13] and on high-dimensional fluid dynamics systems [14] with short training sets. It is thus promising to use physical constraints inside the neural architectures. We have addressed this in the revised manuscript and have revised Lines 42-44 accordingly.
- Preserving equivariance is not analogous to physical constraints in the network. The equivariance-preserving module *may* lead to better representation of rotational, translational, and scaling features in the architecture and thus lead to more physically consistent predictions. However, there is no guarantee that it would do so all the time. In the example shown in this paper, we report improved overall accuracy with the spatial-transformer module. As described in Kashinath et al. [15], we mention in the manuscript that it may be only “*one*” of the many ways to improve physical consistency in the neural architecture (Line 58 in the revised manuscript).

**Referee's comment:**

*I recommend rephrasing these introductory sentences or carefully justifying these two claims.*

*[L97] Is "data-drivenly" correct?*

*[L94-99] These three points, especially the third one, are extremely technical and hard to understand without re-reading*

*them several times. Would it be possible to rephrase them?*

*[L105-110] This section is extremely short: Would it be possible to*

- add more context for why the authors first decided to test the framework on Z500 specifically,*
- add the number of samples for each training set, and*
- add a short justification for the training/validation/test split chosen by the authors?*

**Authors' response:**

We have changed "data-drivenly" to "data-driven" fashion in Line 104. We have slightly rephrased point 3 to make it more clear.

- Since Z500 is representative of the large-scale dynamics in the troposphere, responsible for influencing near-surface weather, and extremes, we had decided to use Z500 as an example. As shown here (based on the referee's suggestion) we can also get equally good prediction performance for T850. Z500 has also been used in Rasp et al., 2020 [1], and Weyn et al., 2020 [11]. We have edited the revised manuscript (Lines 113-115) to explain our choice of using Z500 as the variable in this study. We have also revised the third point in Lines 105-106 based on the referee's suggestion.
- In the revised manuscript between Lines 117-118, we have explained that training data was obtained from years 1979-2015 (~315360 samples), validation data was obtained between 2016-2017 (17520 samples), and we tested on data from 2018 (8760 samples).
- We had not randomly sorted the entire ERA5 data in order to avoid correlation between training and testing sets. Hence, we had split the training and validation in the fashion described above and in Lines 117-118 in the manuscript.

**Referee's comment:**

*[L154] becomes a U-NET → becomes a standard U-NET?*

**Authors' response:**

Yes. We have revised Line 163 so that it says "standard U-NET"

***Referee's comment:***

*[L160] (Over the baseline, U-NET) Benchmarking against another quick fit by the authors is far from rigorous: Following the major comment 1.1, would it be possible to add a subsection to Section 2 or at least a paragraph in Section 3.3 to describe and justify the paper's benchmarking methods?*

**Authors' response:**

As suggested by the referee, we have shown in this response (Table 1) how U-STN12 compares against the benchmarks in the WeatherBench paper [1]. However, we emphasize that the paper is not presenting U-STN12 as a state-of-the-art DDWP for WeatherBench. In fact, we are only showing that an equivariance-preserving module instead an architecture *may* improve its prediction performance. Beyond that, we describe the integration of DA with DDWP models in section 4.2 and a novel multi-step framework in improve the performance of the DDWP+DA model in section 4.3. We have revised the manuscript in section 4.1 (Lines 275-280) to compare with the performance of linear regression and CNN from the WeatherBench paper [1]. However, since we are not presenting a benchmark for WeatherBench, we would prefer not to put a separate section on benchmarking with the WeatherBench models.

***Referee's comment:***

*[L164] "unscented transformation" requires more context for readers who are not versed in the Ensemble Kalman filter*

**Authors' response:**

We have added a reference to unscented transformations in ensemble Kalman filter in Line 187 in the revised manuscript.

***Referee's comment:***

*[L177-178] ~50-100 members are used. Missing reference: Are the authors referring to the Integrated Forecasting System?*

**Authors' response:**

Yes, we are. We have now added a reference to Line 201 in the revised manuscript.

***Referee's comment:***

*[Fig2 caption] "DA ... DDWP" → Consider spelling out acronyms or rephrasing to facilitate the caption's readability.*

**Authors' response:**

We thank the referee for pointing this out. We have now added Table 1 in the revised manuscript that explains the acronyms of the paper. We feel that it would make the captions too long and hard to read by spelling out the acronyms in the caption.

***Referee's comment:***

$k \in [-D, -D + 1, \dots, D - 1, D]$  → Do the authors mean  $k \in \{-D, -D + 1, \dots, D - 1, D\}$  or equivalently  $k \in [[-D, D]]$ ?

**Authors' response:**

Yes, we are. We have changed the text accordingly in Line 217 in the revised manuscript. Thank you.

***Referee's comment:***

[L262-264] I find this claim confusing:

- Is ERA5 truly noise-free?
- Doesn't the de-noising property come from the fact that U-STN is a deterministic neural network, which by definition cannot produce noise?
- Or are the authors referring to the fact that U-STN has a filtering effect that makes the normalized output variance smaller than the normalized input variance? If that is the case, I recommend clarifying the text and quantitatively justifying this claim about U-STN.

**Authors' response:**

We thank the referee for these interesting questions.

- Since ERA5 is obtained after data assimilation, we assume that it is noise free. In this study, since ERA5 is considered as the truth we have further added noise to ERA5 to

mimic observations. Generally, DA algorithms are presented with twin experiments, where the observations are obtained from adding noise to the truth and the analysis states are compared to the truth.

- Yes. Since the U-NET or U-STN is trained on non-noisy data, it is expected to not have any ability to represent noise in the output. We have revised the text in the revised manuscript between Lines 298-300 to reflect this.

***Referee's comment:***

*[L273-275] This qualitative explanation ignores the fact that errors made by the neural network are larger (in physical units) for larger  $\Delta t$ . Therefore, I recommend clarifying that the error accumulation is larger than the error increase with  $\Delta t$ . Would it be possible to quantitatively verify that claim (e.g. via a supplemental figure)?*

**Authors' response:**

We thank the referee for this question. Note, all three DDWP models with  $\Delta t = 1 h$ ,  $\Delta t = 6 h$ , and  $\Delta t = 12 h$  have the same generalization error which is close to 0.003 (for normalized Z500; normalization involves removing the mean and dividing by standard deviation of Z500 of the training set) in one time step of prediction. Therefore, the errors are not larger in physical units. In fact, this is what makes autoregressive prediction with larger  $\Delta t$  more accurate as compared to iteratively predicting with a smaller  $\Delta t$ . However, there is an optimal  $\Delta t$  after which generalization error would keep increasing with an increase in  $\Delta t$ . However, there is no apparent theoretical understanding as to what this optimal  $\Delta t$  depends on for a chaotic system, e.g., neural architecture, system's dynamics, etc. We are currently working towards a theoretical understanding to the non-trivial dependence of error accumulation and error propagation through deep neural architectures for autoregressive prediction. However, at this point of time it is rather difficult to show concrete quantitative evidence on how error propagates through data-driven autoregressive models.

***Referee's comment:***

*"variational DA algorithms": Which variational DA algorithms are the authors referring to? Ideally, provide references for readers who are less familiar with DA.*

**Authors' response:**

We thank the referee for pointing this out. By variational DA algorithms, we mean 3D-Var and 4D-Var. We have added a reference to the same in Line 373 in the revised manuscript.

***Referee's comment:***

*[L347-348] Would it be possible to add the GitHub repository's link as it may be more convenient than downloading the archived code for some readers?*

**Author's response:**

We thank the referee for this helpful suggestion. We have added the Github repository in the code and data availability statement in Line 384 in the revised manuscript.

**References:**

1. Rasp, S., Dueben, P. D., Scher, S., Weyn, J. A., Mouatadid, S., and Thuerey, N.: WeatherBench: A Benchmark Data Set for Data-Driven Weather Forecasting, *Journal of Advances in Modeling Earth Systems*, 12, e2020MS002 203, 2020.
2. Wang, R., Walters, R., and Yu, R.: Incorporating Symmetry into Deep Dynamics Models for Improved Generalization, *arXiv preprint arXiv:2002.03061*, 2020.
3. Bronstein, M., Bruna, J., Cohen, T., and Velickovic, P., *Geometric Deep Learning: Grids, Groups, Graphs, Geodesics, and Gauges*, *arXiv preprint arXiv:2104.13478*, 2021.
4. Liu, C., Zoph, B., Neumann, M., Shlens, J., et al., Progressive neural architecture search, *In Proceedings of the European Conference on Computer Vision (ECCV)*, 2018.
5. Maulik, R., Egele, R., Lusch, B., and Balaprakashan, P., Recurrent neural network architecture search for geophysical emulation, *International Conference on High Performance Computing, Networking, Storage and Analysis*, 2020.
6. Ambadan, J.T., and Tang, Y., Sigma-point particle filter for parameter estimation in a multiplicative noise environment. *Journal of Advances in Modeling Earth Systems*, 3(4), 2011.
7. Brajard, J., Carrassi, A., Bocquet, M., and Bertino, L., Combining data assimilation and machine learning to emulate a dynamical model from sparse and noisy observations: a case study with the Lorenz 96 model, *Journal of Computational Science*, 44, 101 171, 2020.



8. Brajard, J., Carrassi, A., Bocquet, M., and Bertino, L., Combining data assimilation and machine learning to infer unresolved scale parametrization, *Philosophical Transactions of the Royal Society A*, 379, 20200 086, 2021.
9. Carrassi, A., Bocquet, M., Bertino, L., and Evensen, G., Data assimilation in the geosciences: An overview of methods, issues, and perspectives, *Wiley Interdisciplinary Reviews: Climate Change*, 9, e535, 2018.
10. Paul, F., Kunsch, H.R., Particle filters and data assimilation, *Annual Review of Statistics and its Application*, 5, 421-449, 2018.
11. Weyn, J.A., Durran, D.R., and Caruanna, R., Improving Data-Driven Global Weather Prediction Using Deep Convolutional Neural Networks on a Cubed Sphere, of *Advances in Modeling Earth Systems*, 12(9):e2020MS002109, 2020.
12. Jaderberg, M., Simonyan, K., Zisserman, A., et al.: Spatial transformer networks, in: *Advances in Neural Information Processing Systems*, pp. 2017–2025, 2015
13. Bihlo, A., Popovych, R.O., Physics-informed neural networks for the shallow-water equations on the sphere, arxiv preprint arXiv:2104.00615
14. Raissi, M., Yazdani, A., Karniadakis, G., Hidden fluid mechanics: Learning velocity and pressure fields from flow visualizations, *Science*, 367, 1026-1030, 2020.
15. Kashinath, K., Mustafa, M., Albert, A., Wu, J., Jiang, C., Esmailzadeh, S., Azizzadenesheli, K., Wang, R., Chattopadhyay, A., Singh, A., et al.: Physics-informed machine learning: case studies for weather and climate modelling, *Philosophical Transactions of the Royal Society A*, 379, 20200 093, 2021.
